# Supplementary material for: The Advantage of Inactivated Vaccine for Preventing the Omicron Outbreak
Source: Preprints.org preprint supplement (doi:10.20944/preprints202203.0076.v1), 2022-03-04
Supplement: Supplementary file 1 [file supplementary]

Jianping Huang,

Professor and Director

Collaborative Innovation Center for

Western Ecological Safety

College of Atmos. Sci.

Lanzhou University, Lanzhou, China

E-mail: [hjp@lzu.edu.cn](mailto:hjp@lzu.edu.cn)

Dear Editor,

To prevent additional severe global health disasters, I am writing to request the rapid publication of our manuscript, which serves an recommendation for future pharmaceutical interventions against highly mutated viruses. We have attached our manuscript, entitled “The advantage of inactivated vaccine for preventing the Omicron outbreak”, which we hope to be published in *Preprints.* In this study, we compared the protection of different vaccines against outbreaks of highly mutated strains. Combined with epidemiological model simulation, the broad spectrum advantage of inactivated vaccine was further identified. Current vaccines are not a complete and permanent barrier and need to be developed with broad spectrum and safety for long-term protection against virus evolution and mutation. Our results support new ideas for future vaccine development.

If our paper is accepted by *Preprints*, we believe it will attract the attention of many readers and become an important reference for relevant institutions. It is not only of great academic value to the epidemiology field but also provides a scientific basis for policy formulation, which will help save lives during this pandemic. Therefore, it is of great value in the global fight against COVID-19.

Sincere


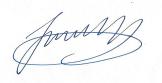


Jianping Huang
